# Supplementary material
Source: PubMed Central journal article supplement (PMC6324730)
Supplement: NIHMS1511597-supplement-1.pdf [file NIHMS1511597-supplement-1.pdf]

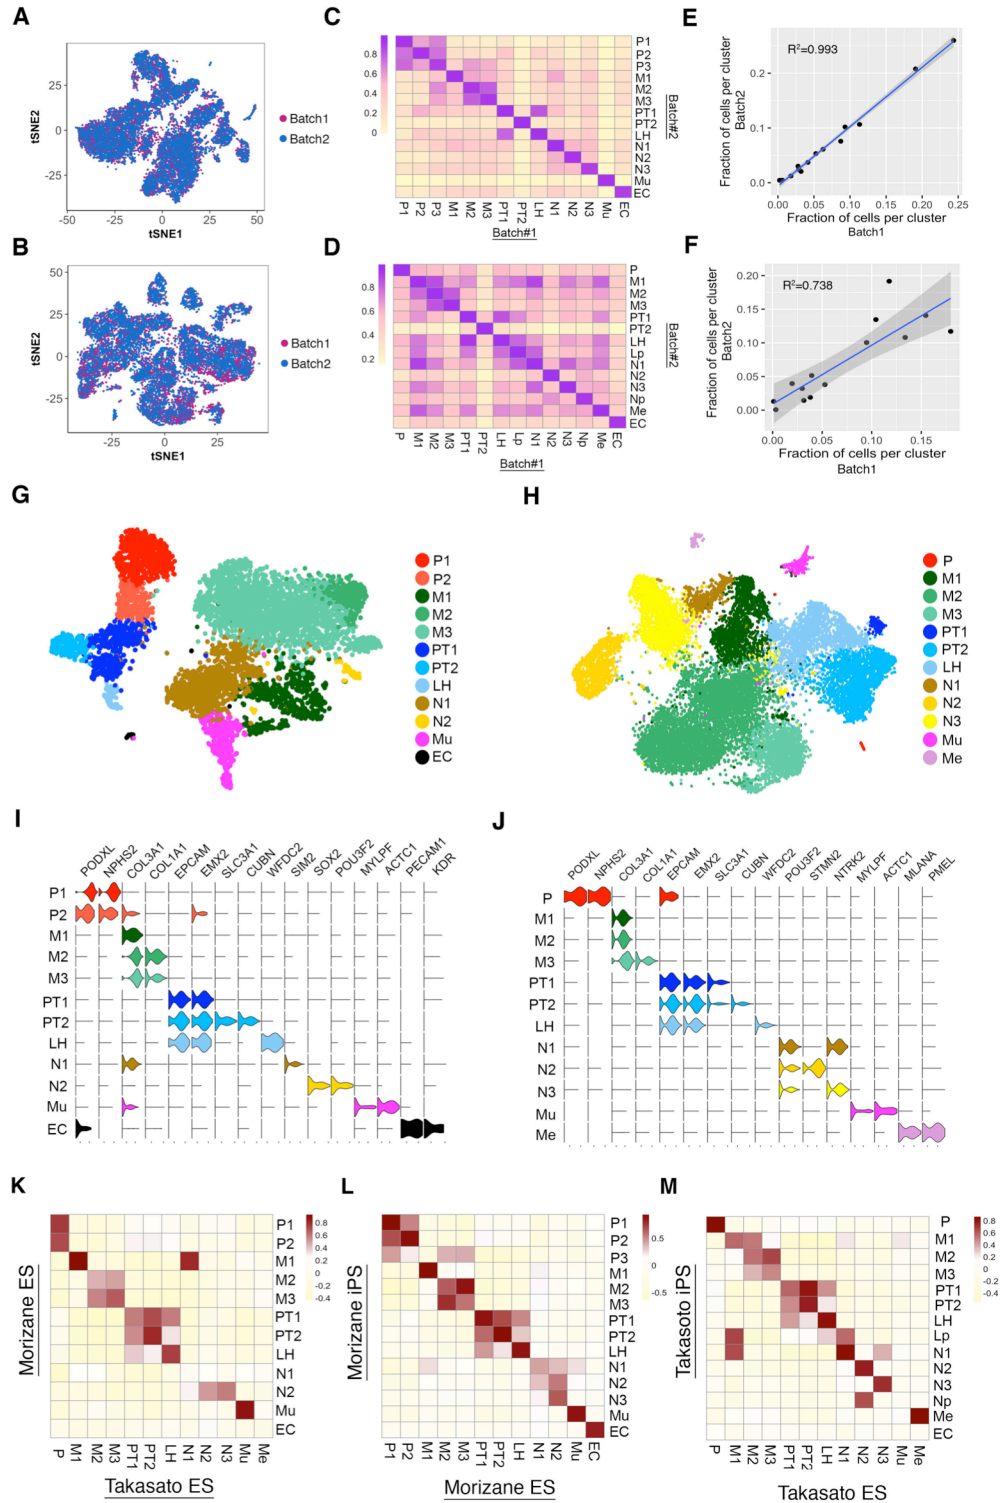

**Figure S1, Related to Figure 1 and Figure 2. Batch effects and comparison of kidney cell types and differentiation state in hESC-derived kidney organoids generated with both protocols. (A, B)** Cells in tSNE are visualized according to their batch of origin. Nearly all clusters in organoids from either the Morizane (A) or Takasato protocol (B) contain cells from both batches. **(C, D)** Correlation heatmaps of cell expression profiles between batches. Cells in the same cluster from both batches show highly correlated gene expression (Pearson's  $r > 0.9$  for all clusters) in the Morizane protocol (C) and Takasato protocol (D). **(E, F)** The overall cell fraction for each cluster between batches in the Morizane protocol (E) and Takasato protocol (F) is similar. The higher proportional representation between batches

from the Morizane protocol likely reflects the fact that 8 organoids were combined for each batch, whereas the larger Takasato protocol organoids consisted of one single organoid per batch. **(G,H)** tSNE of all cells clustered by Seurat, showing clusters and their identity for the Morizane protocol **(G)** and Takasato protocol **(H)**. **(I,J)** Violin plots of marker gene expression for each cell type across clusters for Morizane **(I)** and Takasato **(J)** organoids. Heatmap indicating Pearson's correlations on the averaged profiles among common cell types for Morizane and Takasato organoids for hESC-derived organoids **(K)** and iPS vs. hESC-derived according to protocol **(L and M)**.

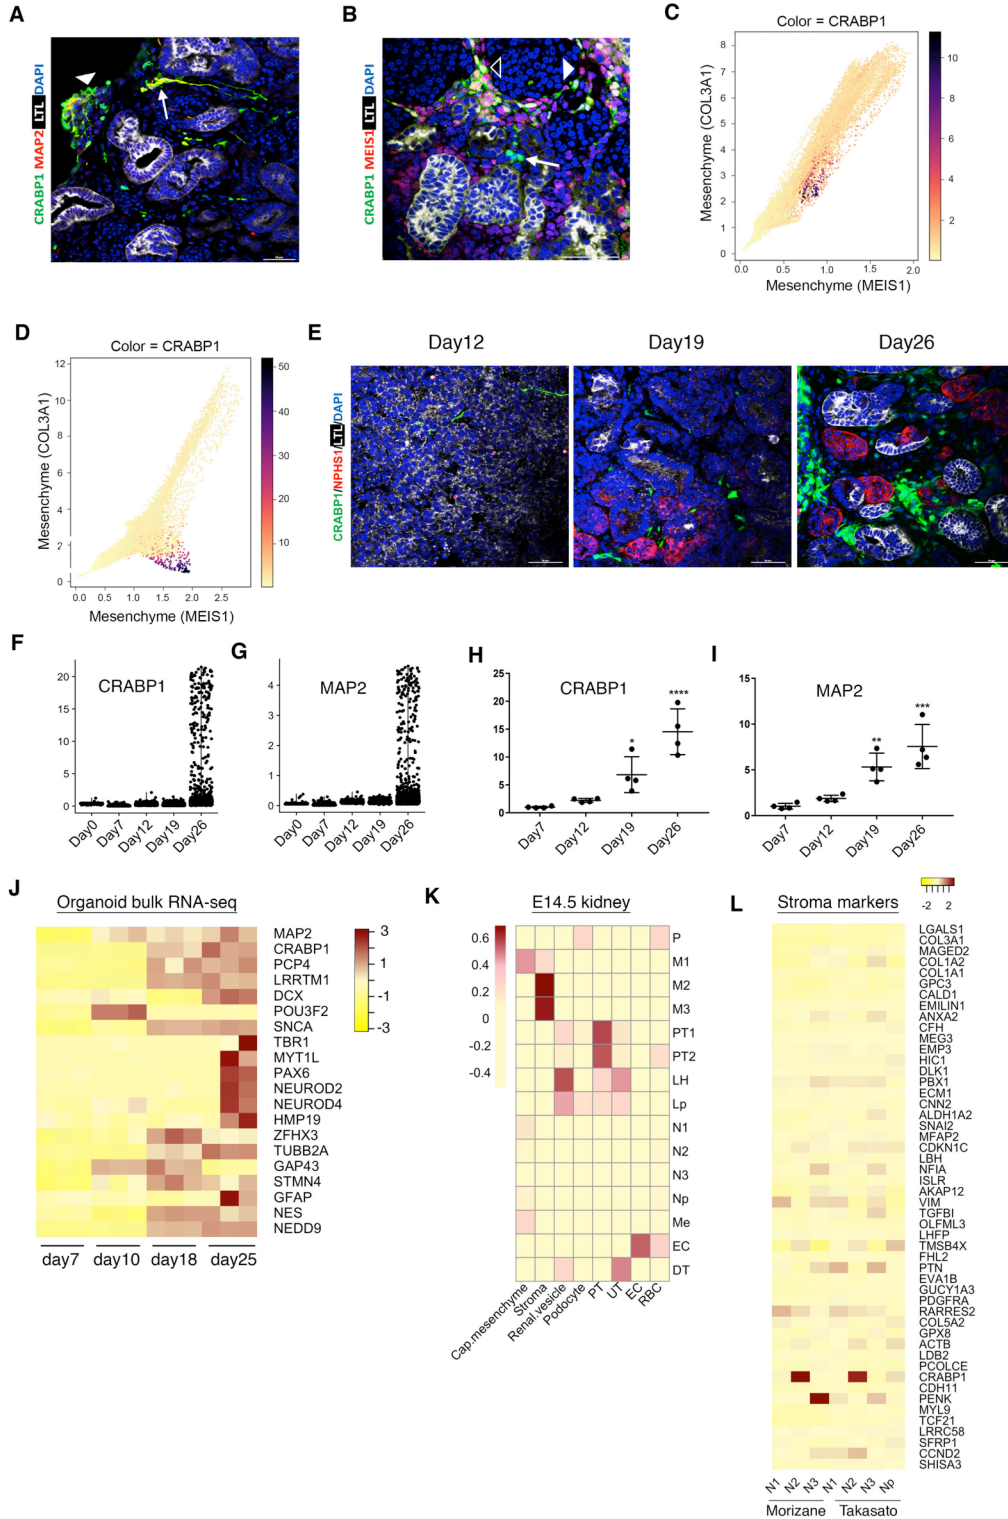

**Figure S2, Related to Figure 2. Characterizing off target neuron neuronal differentiation in kidney organoids. (A-B)** Immunofluorescence analysis of day 26 organoids differentiated using the Takasato protocol. Scattered interstitial cells coexpress both neuronal markers CRABP1 and MAP2 in the interstitium. Some of these extend long processes resembling neurites (arrow). Clusters of neuron-like cells can also be seen, usually on the periphery of the organoid (arrowhead). LTL, lotus tetraglobon lectin. Scale bar 50µm. **(B)** CRABP1 immunostaining of day 26 Takasato protocol kidney organoids shows that CRABP1 is coexpressed in a subset of MEIS1 positive renal stroma. Merged image shows CRABP1 and MEIS1 copositive cells (open arrowhead), cells positive for CRABP1 only (arrow) and cells positive for MEIS1 only (filled arrowhead). Scale bar 50µm.

**(C)** Gene imputation analysis using MAGIC to visualize gene-gene interactions. CRABP1 is expressed in a minority of COL3A1/MEIS1 positive mesenchyme in day 26 Morizane protocol organoids, supporting the immunofluorescence data. **(D)** Similar analysis from Takasato protocol day 26 organoids, where CRABP1 expression is more correlated with MEIS1 expression than with COL3A1 expression. **(E)** Co-staining of CRABP1, podocyte marker NPHS1 and proximal tubule marker LTL during organoid development (Takasato protocol). Very few CRABP1 cells are detected at day 19 with many more at day 26. **(F,G)** Analysis of CRABP1 and MAP2 expression in DropSeq dataset reveals an abrupt rise of expression in a subset of organoid cells at day 26. **(H,I)** Analysis of CRABP1 and MAP2 mRNA by qPCR of bulk extracted RNA over time (Takasato protocol). **(J)** Reanalysis of organoid RNA-seq expression from Takasato *et al.* showing that a panel of genes found in neural clusters by scRNA-seq in this paper were expressed at later timepoints in the original dataset. **(K)** Pearson's correlation for all Takasato protocol organoid cell clusters compared to e14.5 kidney. There is poor correlation of off target clusters (N1, N2, N3, Np, Me) with any mouse embryonic kidney cluster. **(L)** Very few genes from embryonic mouse stroma are expressed in off target cell types from either protocol. Mouse data is from (Magella *et al.*, 2018).



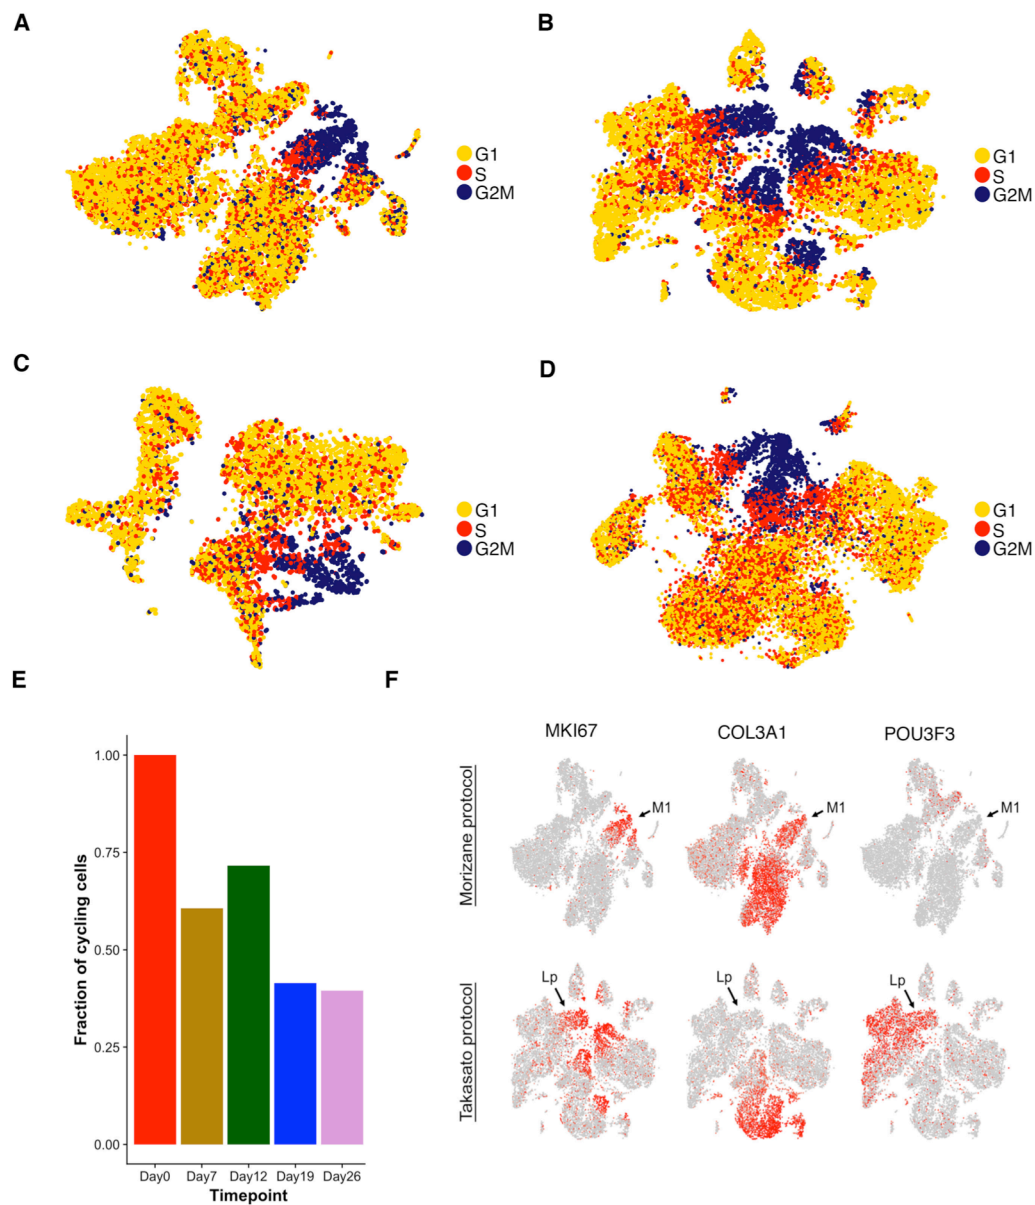

**Figure S3, Related to Figure 2. Comparison of cell cycle status across protocols.** iPSC-derived organoids using the Morizane (A) and Takasato protocols (B). hESC-derived organoids from the Morizane (C) and Takasato (D) protocols. (E) Fraction of total organoid cells in the G2M, S or G1 cell cycle across time in iPSC differentiated using the Takasato protocol. (F) Both the Morizane M1 and the Takasato Lp (loop progenitor) cluster expressed high levels of the cell cycle gene MKI67, but divergent expression of COL3A1 and POU3F3.

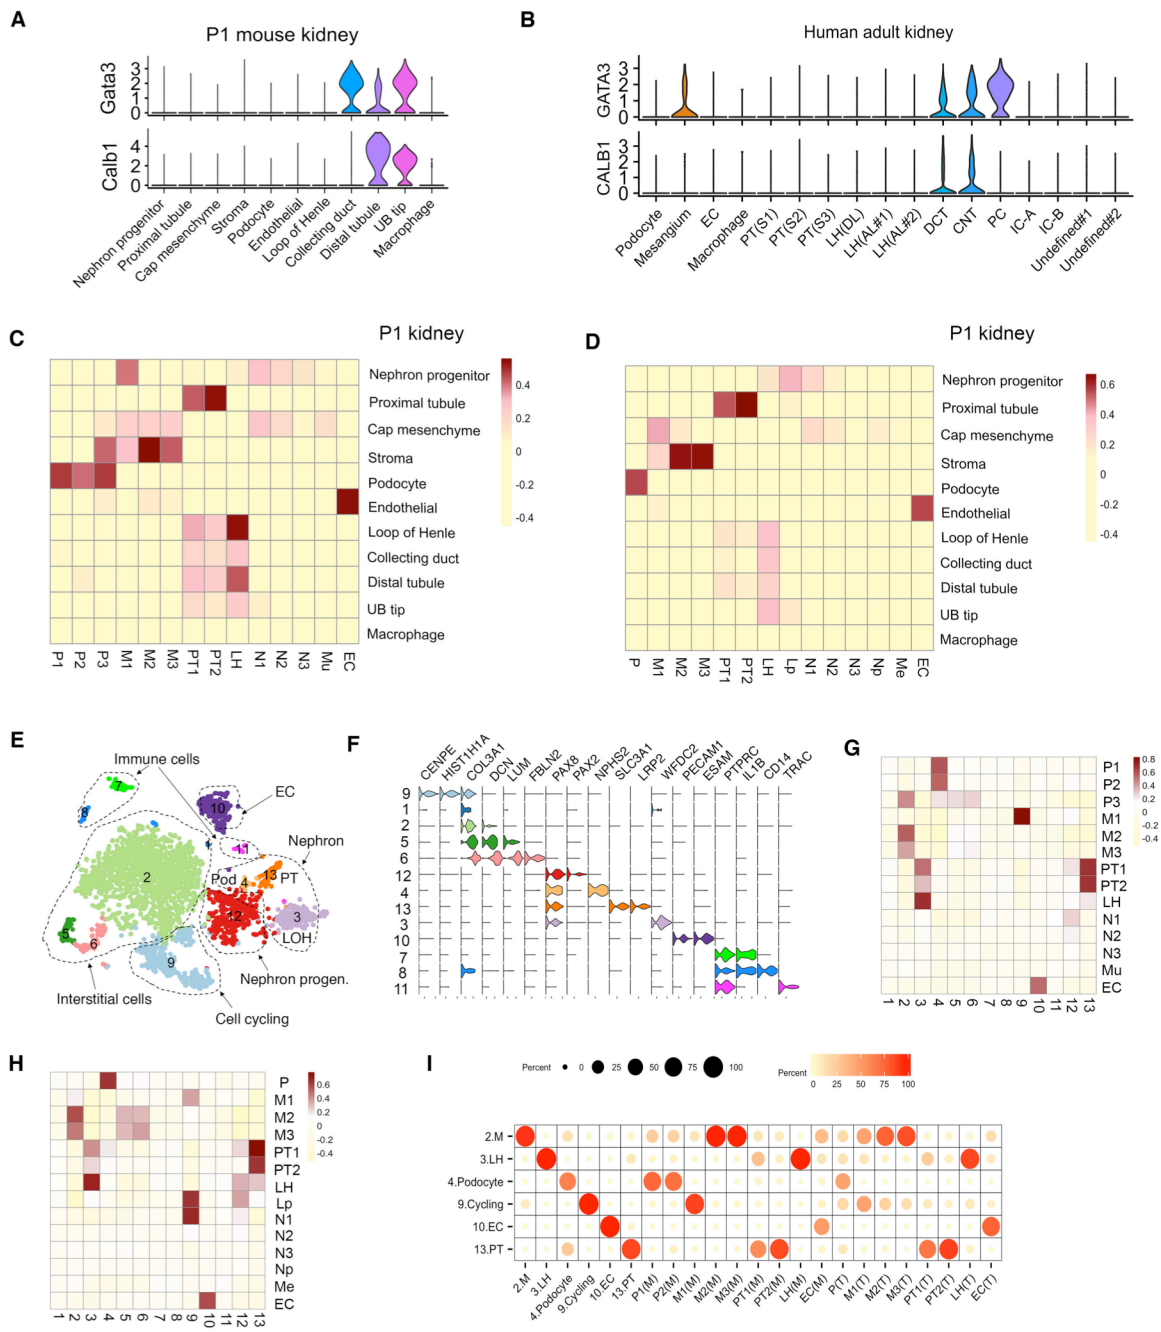

**Figure S4, Related to Figure 3. Expression of GATA3 and CALB1 in distal nephron segments and comparison of organoids to P1 mouse kidney and human fetal kidney (week 16).** (A) Violin plot showing expression of GATA3 in collecting duct, distal tubule and ureteric bud tip in P1 mouse kidney. In the same dataset, CALB1 is expressed in distal tubule and UB tip. P1 mouse kidney data is from (Adam et al., 2017). (B) GATA3 expression in adult human kidney (data from this manuscript) is limited to mesangium, distal connecting tubule, connecting segment and principal cells. CALB1 expression is observed only in distal connecting tubule and connecting segment but not in principal cells. (C,D) Kidney organoids compared to mouse p1 kidney. Pearson's correlation for all organoid cell clusters from Morizane protocol (C) or Takasato protocol (D). P1 mouse kidney data is from (Adam et al., 2017). (E) Reanalysis of a recently published scRNA-seq dataset from human week 16 fetal kidney. tSNE showing major cell clusters as reported originally (Lindstrom et al., 2018). (F)

Violin plot showing marker gene expression for all 13 clusters. (**G,H**) Pearson's correlation between organoid cell types from each protocol and human fetal kidney from Morizane protocol (**G**) or Takasato protocol (**H**). (**I**) Dot plot showing the proportion of cells in each cluster that were classified to each organoid cluster using a multiclass random forest classifier as in (Habib et al., 2017). 60% of the human fetal dataset was used as a training dataset (first six columns on left side of dotplot).

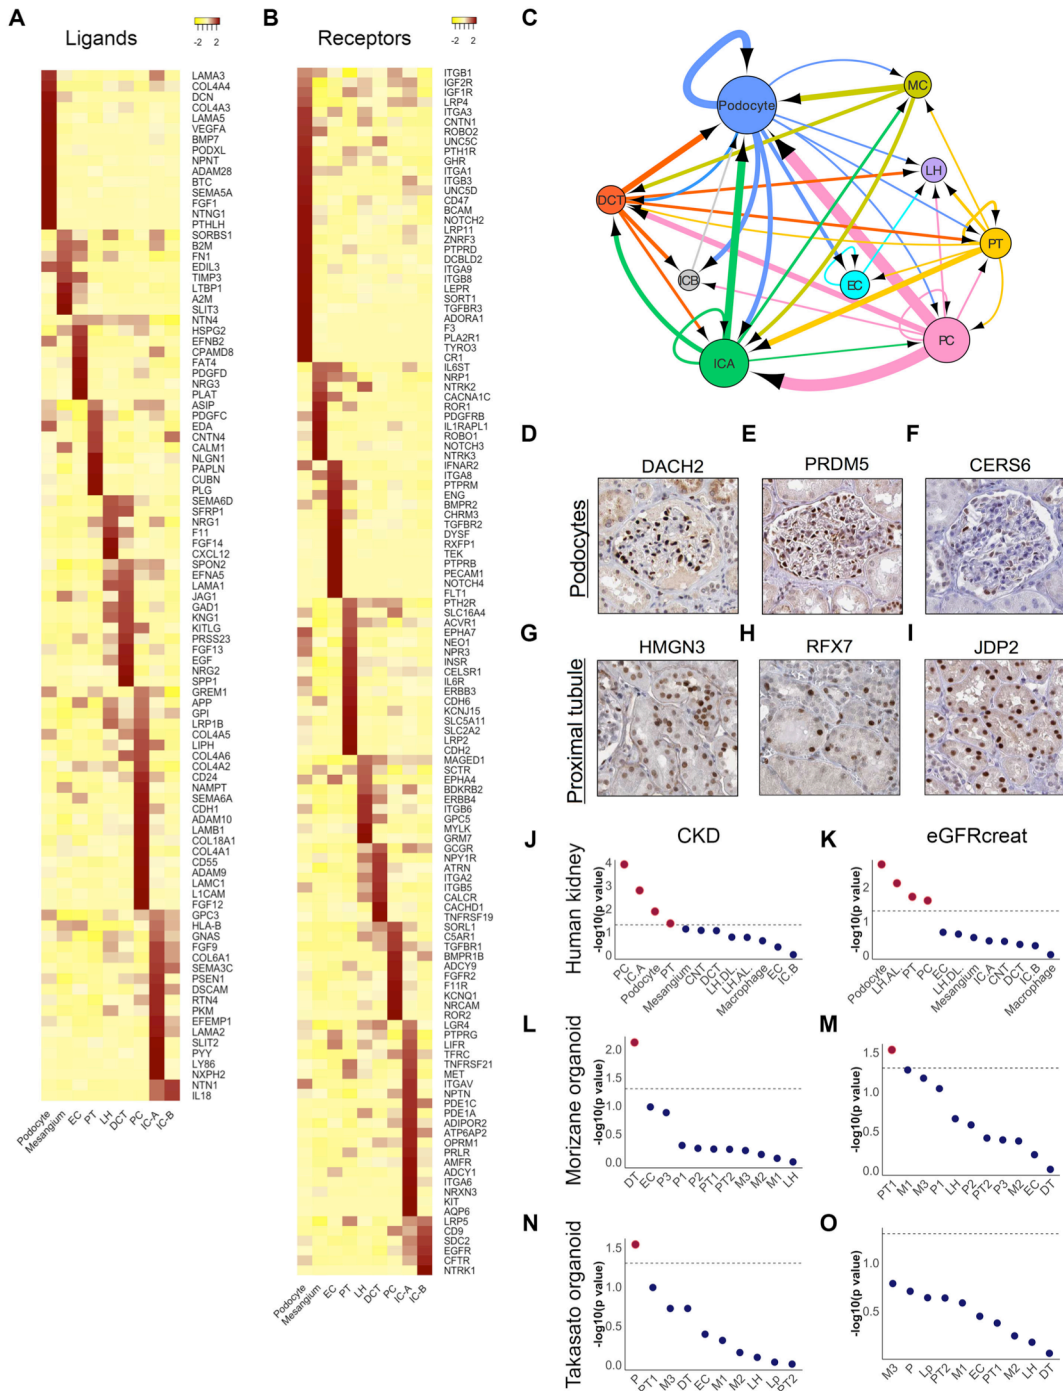

**Figure S5, Related to Figure 4 and Figure 5. Receptor – ligand and transcription factor expression with CKD and eGFR GWAS associations in healthy adult kidney cell types. (A)** Ligands detected in adult kidney and cell type specific expression. **(B)** Receptors for which ligands could also be detected, and cell specific expression. **(C)** Receptor and ligand connectome in healthy adult kidney based on cell-type specific expression of ligand-receptor pairs. **(D-F)** Novel transcription factors expressed in podocytes and **(G-I)** proximal tubule. Immunohistochemistry data from the Human Protein Atlas (<https://www.proteinatlas.org/>). **(J-O)** CKD and eGFR GWAS associations with single cell types from adult kidney vs. organoids. RolyPoly-inferred trait relevant cell types in CKD or eGFR for adult kidney (**J,K**), Morizane organoids (**L,M**) and Takasato organoids (**N,O**). Cell types are ranked by p value, which represents the strength of the association with CKD or eGFR. RolyPoly analysis was based on (Calderon et al., 2017).

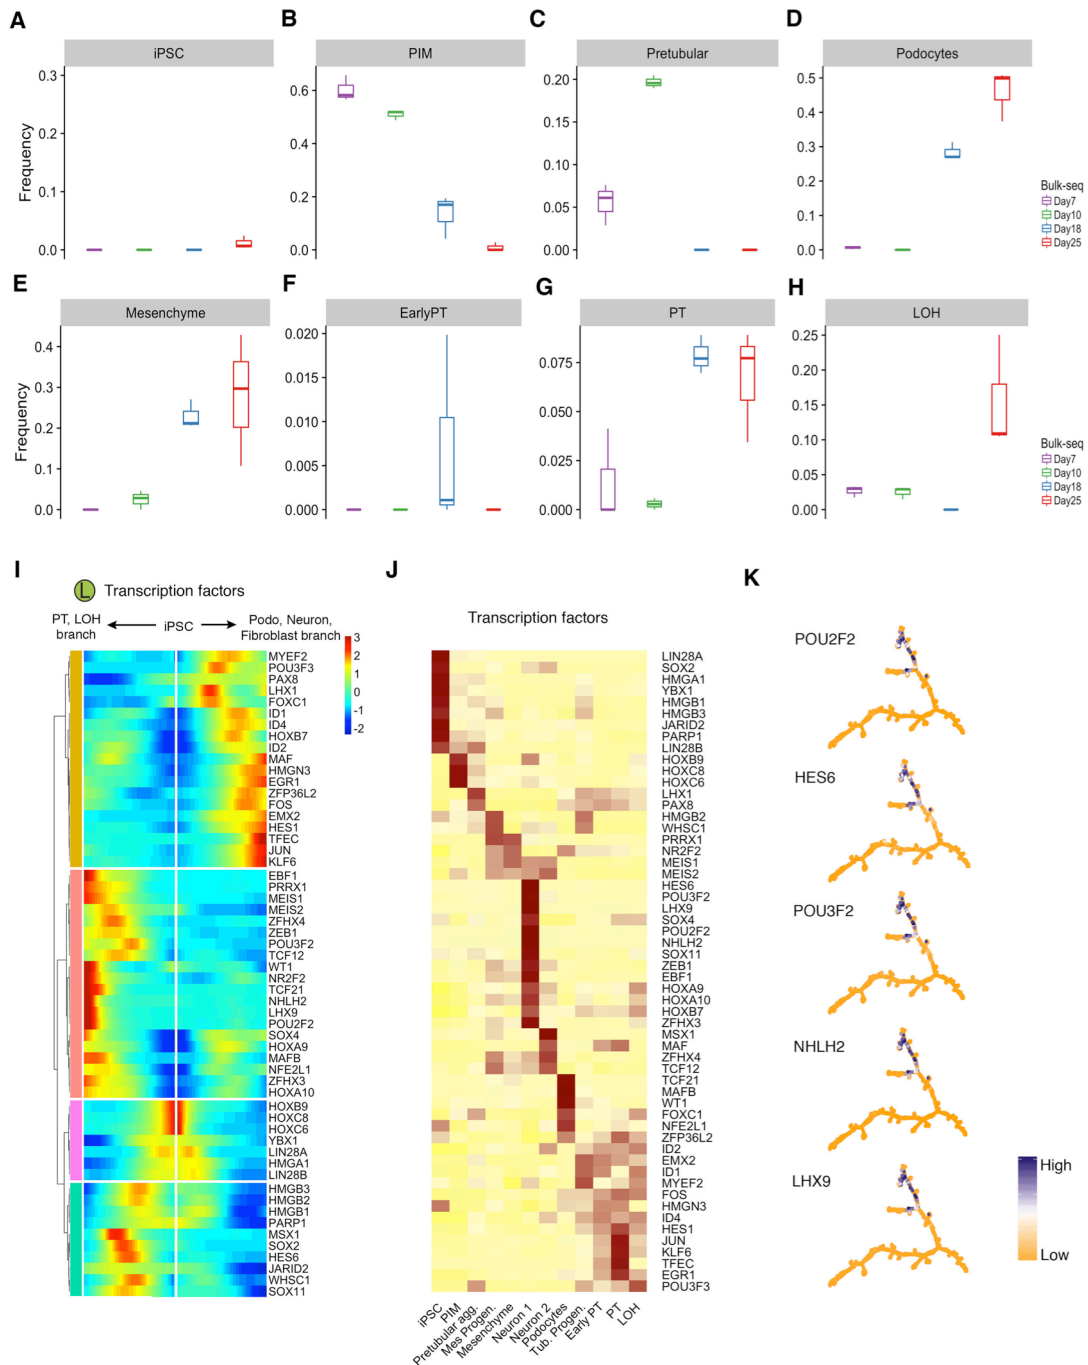

**Figure S6, Related to Figure 6. Estimation of cell type proportions during differentiation of Takasato organoids and differential transcription factor expression during organoid differentiation.** We used our own scRNA-seq time course data to deconvolve bulk RNA-seq data (Takasato et al., 2015). The relative proportions of iPSC (**A**), posterior intermediate mesoderm (**B**), pretubular aggregate (**C**), podocytes (**D**), mesenchyme (**E**), early proximal tubule (**F**), proximal tubule (**G**) and loop of henle (**H**) over time is shown. (**I**) Heat map showing kinetics of branch-dependent transcription factor expression identified by BEAM (Monocle2) and differential gene analysis over the full organoid time course. (**J**) The same TFs were mapped to each cell type from the time-course dataset. (**K**) Neuron specific TF expression was restricted to neural lineage cells as shown by the cell trajectory gene plot.



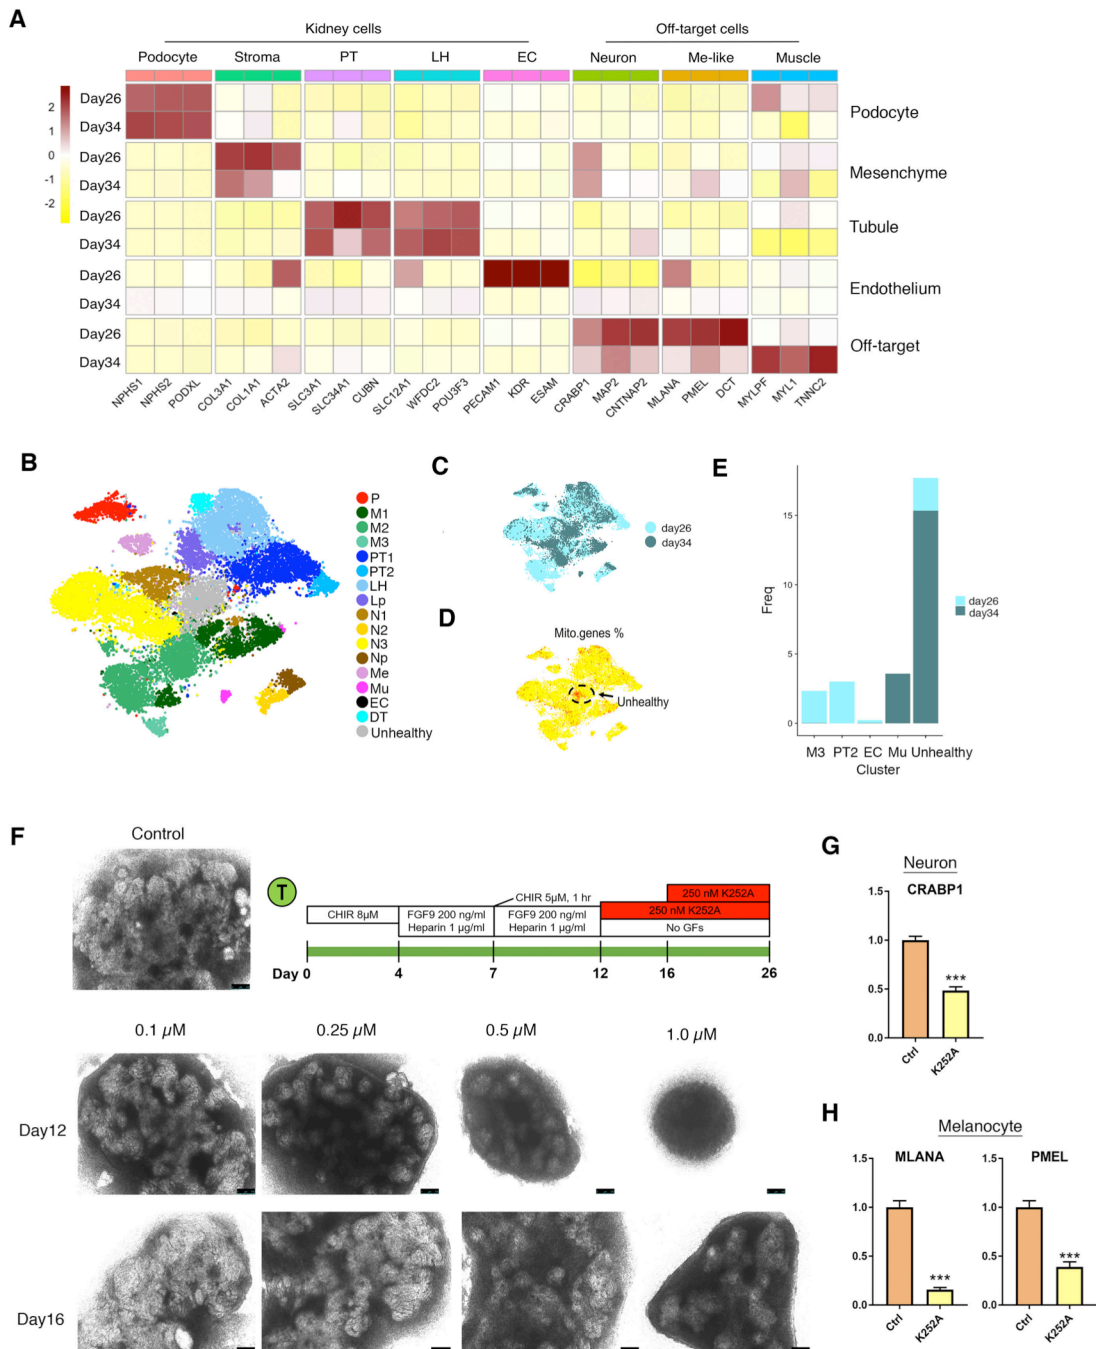

**Figure S7, Related to Figure 7. Increased differentiation time does not improve differentiation state but NTRK2 inhibition reduces off-target cell types. (A)** scRNA-seq profiles of day 26 vs. day 34 organoids generated with the Takasato protocol were compared. Average expression of selected marker genes for, major cell types are shown. In general, there is reduction in differentiated marker expression at day 34 compared to day 26, with complete loss of endothelial cells and the appearance of a muscle cluster. PT: proximal tubule; LH: Loop of Henle; EC: endothelial cells. **(B)** tSNE of all day 26 and day 34 data. Note new muscle and unhealthy cell clusters. **(C)** Contributions of day 26 vs. day 34 cells to the tSNE. **(D)** A new cluster has a high percentage of mitochondrial genes. **(E)** Relative contributions of day 24 vs. day 34 in differentiated kidney cell types: mature stroma (M3), Proximal tubule (PT2) and endothelial cells (EC). There is also an increased contribution of muscle (Mu) and unhealthy cells at day 34. **(F)** Dose and timing of NTRK2 inhibitor K252a during organoid maturation. Four doses of K252a were tested with administration starting either at day 12 or day 16. A dose of 250 nM was chosen because it did not alter organoid

size or gross tubular morphology. Higher doses caused reduced organoid size. Scale bar, 100  $\mu\text{m}$ . **(G,H)** Reduction in off-target marker expression with K252a treatment during days 12 – 26 of organoid differentiation. qPCR measurements from day 26 total organoid mRNA. **\*\*\***,  $p < 0.001$ .



**Supplementary table S1, Related to STAR Methods. Count statistics**

|                         | <b>Organoid #</b> | <b>Total cell #</b> | <b>nUMI/cell</b> | <b>nGene/cell</b> | <b>%mito/cell</b> |
|-------------------------|-------------------|---------------------|------------------|-------------------|-------------------|
| <b>Takasato iPS #1</b>  | 1                 | 7,379               | 2,689            | 1,495             | 5.35              |
| <b>Takasato iPS #2</b>  | 1                 | 7,352               | 2,675            | 1,470             | 7.02              |
| <b>Takasato iPS #3</b>  | 1                 | 5,269               | 1,805            | 1,040             | 3.79              |
| <b>Takasato ES #1</b>   | 2                 | 8,857               | 1,756            | 1,012             | 2.29              |
| <b>Takasato ES #2</b>   | 2                 | 10,471              | 1,687            | 999               | 2.77              |
| <b>Takasato BDNF #1</b> | 2                 | 2,149               | 3,203            | 1,594             | 12.9              |
| <b>Takasato BDNF #2</b> | 2                 | 1,165               | 2,775            | 1,385             | 14.3              |
| <b>Morizane iPS #1</b>  | 12                | 8,471               | 1,756            | 1,049             | 9.33              |
| <b>Morizane iPS #2</b>  | 12                | 6,720               | 1,764            | 1,082             | 7.61              |
| <b>Morizane iPS #3</b>  | 12                | 2,911               | 1,574            | 929               | 2.03              |
| <b>Morizane ES</b>      | 12                | 7,081               | 2,220            | 1,176             | 2.19              |
| <b>Takasato Day 0</b>   | 1                 | 218                 | 3,865            | 1,798             | 2.99              |
| <b>Takasato Day 7</b>   | 1                 | 1,741               | 1,948            | 1,091             | 6.28              |
| <b>Takasato Day 12</b>  | 1                 | 1,169               | 2,098            | 1,142             | 6.88              |
| <b>Takasato Day 19</b>  | 1                 | 1,097               | 1,848            | 1,087             | 5.25              |
| <b>Takasato Day 26</b>  | 1                 | 4,965               | 1,544            | 955               | 6.48              |
| <b>Takasato Day 34</b>  | 1                 | 6,115               | 2,298            | 1,245             | 8.85              |
| <b>Human kidney #1*</b> | NA                | 1,684               | 3,766            | 1,749             | 0.18              |
| <b>Human kidney #2*</b> | NA                | 2,840               | 4,034            | 1,834             | 0.33              |

\*single nucleus sequencing: batch number denotes technical replicate from the same kidney

**Supplementary table S2, Related to Figure 4. Top transcription factors in human proximal tubule**

| TF       | DC | CC | BC | DFC | DCC | DDC | AVG.<br>RANK | PT (T) | PT (M) | Known |
|----------|----|----|----|-----|-----|-----|--------------|--------|--------|-------|
| BNC2     | 1  | 1  | 1  | 1   | 1   | 1   | 1            | No     | No     | Yes   |
| HNF4A    | 2  | 2  | 2  | 2   | 2   | 2   | 2            | No     | Yes    | Yes   |
| L3MBTL4  | 3  | 3  | 3  | 3   | 3   | 3   | 3            | No     | No     | No    |
| PPARA    | 4  | 4  | 4  | 6   | 6   | 5   | 4            | Yes    | Yes    | Yes   |
| GLIS1    | 8  | 6  | 8  | 4   | 4   | 4   | 5            | No     | No     | Yes   |
| NFIA     | 6  | 5  | 6  | 6   | 6   | 6   | 6            | No     | No     | Yes   |
| ZBTB20   | 5  | 7  | 5  | 6   | 6   | 7   | 7            | No     | No     | Yes   |
| CUX1     | 7  | 8  | 7  | 6   | 6   | 9   | 8            | No     | No     | Yes   |
| MAF      | 9  | 9  | 9  | 6   | 6   | 10  | 9            | Yes    | Yes    | Yes   |
| HNF4G    | 10 | 10 | 10 | 6   | 6   | 11  | 10           | Yes    | Yes    | Yes   |
| NFATC3   | 11 | 11 | 11 | 6   | 6   | 12  | 11           | No     | No     | Yes   |
| MLXIPL   | 12 | 12 | 12 | 6   | 6   | 13  | 12           | No     | No     | No    |
| ZHX3     | 13 | 13 | 13 | 6   | 6   | 14  | 13           | No     | No     | Yes   |
| ZFAT     | 14 | 14 | 14 | 6   | 6   | 15  | 14           | No     | No     | No    |
| FOXP2    | 15 | 15 | 15 | 6   | 6   | 16  | 15           | No     | No     | Yes   |
| HMGN3    | 16 | 16 | 16 | 6   | 6   | 17  | 16           | Yes    | No     | No    |
| NFIB     | 19 | 17 | 18 | 6   | 6   | 18  | 17           | Yes    | No     | Yes   |
| NR1H4    | 18 | 20 | 17 | 6   | 6   | 19  | 18           | Yes    | Yes    | Yes   |
| ZEB2     | 21 | 18 | 23 | 6   | 6   | 20  | 19           | No     | No     | Yes   |
| SMARCC1  | 17 | 25 | 20 | 6   | 6   | 22  | 20           | No     | No     | Yes   |
| PAX8     | 20 | 22 | 21 | 6   | 6   | 23  | 21           | Yes    | Yes    | Yes   |
| ESR1     | 22 | 19 | 25 | 6   | 6   | 21  | 22           | No     | No     | No    |
| CREB5    | 30 | 34 | 19 | 5   | 5   | 8   | 23           | Yes    | No     | No    |
| RFX7     | 23 | 23 | 27 | 6   | 6   | 24  | 24           | No     | No     | No    |
| SATB2    | 24 | 27 | 22 | 6   | 6   | 26  | 25           | No     | No     | Yes   |
| ZNF521   | 26 | 24 | 28 | 6   | 6   | 27  | 26           | No     | No     | No    |
| HNF1A    | 27 | 21 | 34 | 6   | 6   | 25  | 27           | No     | No     | Yes   |
| ST18     | 25 | 31 | 24 | 6   | 6   | 30  | 28           | No     | No     | No    |
| TFEC     | 29 | 25 | 33 | 6   | 6   | 28  | 29           | Yes    | Yes    | Yes   |
| HSFY2    | 28 | 32 | 26 | 6   | 6   | 29  | 29           | No     | No     | No    |
| ZBTB16   | 33 | 29 | 31 | 6   | 6   | 31  | 31           | No     | No     | No    |
| MEIS1    | 31 | 32 | 29 | 6   | 6   | 34  | 32           | No     | No     | No    |
| ZNF69    | 33 | 30 | 38 | 6   | 6   | 32  | 33           | No     | No     | No    |
| AR       | 32 | 37 | 30 | 6   | 6   | 35  | 34           | No     | No     | Yes   |
| ZKSCAN1  | 39 | 28 | 42 | 6   | 6   | 33  | 35           | Yes    | No     | No    |
| HSFY1    | 38 | 36 | 35 | 6   | 6   | 36  | 36           | No     | No     | No    |
| TSHZ1    | 35 | 38 | 36 | 6   | 6   | 38  | 37           | No     | No     | No    |
| ARID4A   | 36 | 38 | 39 | 6   | 6   | 39  | 38           | No     | No     | No    |
| NRL      | 40 | 35 | 41 | 6   | 6   | 37  | 39           | No     | No     | No    |
| RUNX1    | 41 | 41 | 37 | 6   | 6   | 41  | 40           | No     | No     | No    |
| GLI3     | 41 | 40 | 40 | 6   | 6   | 40  | 41           | No     | No     | No    |
| RORB     | 37 | 48 | 32 | 6   | 6   | 48  | 42           | No     | No     | No    |
| TUB      | 43 | 45 | 43 | 6   | 6   | 45  | 43           | No     | No     | No    |
| CSDC2    | 44 | 46 | 44 | 6   | 6   | 46  | 44           | No     | No     | No    |
| JDP2     | 50 | 42 | 50 | 6   | 6   | 42  | 45           | No     | No     | No    |
| ZNF75D   | 45 | 47 | 46 | 6   | 6   | 47  | 46           | No     | No     | No    |
| ZNF697   | 52 | 43 | 51 | 6   | 6   | 43  | 47           | No     | No     | No    |
| SLC2A4RG | 51 | 44 | 51 | 6   | 6   | 44  | 48           | No     | Yes    | No    |
| KLF13    | 46 | 50 | 47 | 6   | 6   | 49  | 49           | No     | No     | No    |
| EMX2     | 47 | 49 | 48 | 6   | 6   | 50  | 50           | Yes    | Yes    | Yes   |
| E2F3     | 48 | 50 | 49 | 6   | 6   | 51  | 51           | No     | No     | Yes   |
| NR1I3    | 48 | 54 | 45 | 6   | 6   | 54  | 52           | No     | No     | No    |
| NFE2L1   | 52 | 52 | 51 | 6   | 6   | 52  | 53           | No     | No     | No    |
| CAPN15   | 52 | 53 | 51 | 6   | 6   | 53  | 54           | No     | No     | No    |

TF: transcription factor; DC: Degree Centrality; CC: Closeness Centrality; BC: Betweenness Centrality; DFC: Disruptive Fragmentation Centrality; DCC: Disruptive Connection Centrality; DDC: Disruptive Distance Centrality; AVG.RANK: Average Ranking. T: Takasato protocol; M: Morizane protocol

**Supplementary table S3, Related to Figure 4. Top transcription factors in human podocyte**

| TF     | DC | CC | BC | DFC | DCC | DDC | AVG.<br>RANK | Podo<br>(T) | Podo<br>(M) | Known |
|--------|----|----|----|-----|-----|-----|--------------|-------------|-------------|-------|
| DACH1  | 1  | 1  | 1  | 2   | 2   | 1   | 1            | No          | Yes         | Yes   |
| RERE   | 2  | 2  | 2  | 1   | 1   | 2   | 2            | No          | No          | No    |
| DACH2  | 5  | 7  | 5  | 4   | 4   | 4   | 3            | No          | Yes         | No    |
| WT1    | 8  | 9  | 6  | 3   | 3   | 3   | 4            | Yes         | Yes         | Yes   |
| TCF7L1 | 7  | 3  | 3  | 7   | 7   | 5   | 4            | No          | No          | No    |
| BACH1  | 11 | 5  | 7  | 7   | 7   | 9   | 6            | Yes         | No          | No    |
| CERS6  | 6  | 13 | 9  | 6   | 6   | 7   | 7            | No          | No          | No    |
| SOX6   | 3  | 11 | 4  | 12  | 12  | 11  | 8            | No          | No          | No    |
| ARID1B | 4  | 15 | 10 | 7   | 7   | 10  | 8            | No          | No          | No    |
| TEAD1  | 9  | 4  | 8  | 12  | 12  | 13  | 10           | No          | No          | Yes   |
| NFATC3 | 14 | 17 | 11 | 7   | 7   | 8   | 11           | No          | No          | Yes   |
| ZBTB7C | 10 | 12 | 14 | 12  | 12  | 14  | 12           | Yes         | Yes         | Yes   |
| SMAD6  | 29 | 22 | 12 | 4   | 4   | 6   | 13           | No          | Yes         | Yes   |
| JARID2 | 19 | 16 | 17 | 7   | 7   | 12  | 14           | No          | No          | No    |
| BAZ2B  | 13 | 10 | 13 | 18  | 18  | 19  | 15           | No          | No          | No    |
| CASZ1  | 15 | 6  | 16 | 18  | 18  | 20  | 16           | No          | No          | Yes   |
| LMX1B  | 12 | 14 | 15 | 18  | 18  | 17  | 17           | No          | No          | Yes   |
| HMGN3  | 18 | 30 | 19 | 12  | 12  | 15  | 18           | Yes         | No          | No    |
| TULP4  | 16 | 18 | 18 | 18  | 18  | 21  | 19           | Yes         | Yes         | No    |
| ZNF124 | 21 | 8  | 23 | 18  | 18  | 22  | 20           | No          | No          | No    |
| PRDM5  | 17 | 19 | 22 | 18  | 18  | 23  | 21           | No          | No          | No    |
| TSHZ2  | 31 | 33 | 20 | 12  | 12  | 16  | 22           | No          | No          | No    |
| KLF7   | 21 | 20 | 26 | 18  | 18  | 24  | 23           | No          | No          | No    |
| TCF7L2 | 20 | 21 | 27 | 18  | 18  | 25  | 24           | Yes         | No          | Yes   |
| TSHZ3  | 33 | 37 | 25 | 12  | 12  | 18  | 25           | No          | No          | No    |
| ETV6   | 25 | 24 | 28 | 18  | 18  | 27  | 26           | No          | No          | No    |
| ZEB2   | 24 | 32 | 21 | 18  | 18  | 28  | 27           | No          | No          | Yes   |
| NFIC   | 26 | 23 | 31 | 18  | 18  | 26  | 28           | No          | No          | No    |
| ZNF521 | 23 | 31 | 24 | 18  | 18  | 31  | 29           | No          | No          | No    |
| ELF1   | 27 | 25 | 30 | 18  | 18  | 29  | 30           | No          | No          | No    |
| SMAD2  | 30 | 27 | 33 | 18  | 18  | 30  | 31           | No          | No          | Yes   |
| HIVEP3 | 36 | 26 | 29 | 18  | 18  | 32  | 32           | No          | No          | No    |
| ZBTB1  | 32 | 28 | 34 | 18  | 18  | 33  | 33           | No          | No          | No    |
| MAFB   | 27 | 34 | 32 | 18  | 18  | 35  | 34           | Yes         | Yes         | Yes   |
| SMAD1  | 37 | 29 | 37 | 18  | 18  | 34  | 35           | No          | No          | Yes   |
| ZNF846 | 34 | 35 | 35 | 18  | 18  | 36  | 36           | No          | No          | No    |
| ZNF250 | 35 | 36 | 36 | 18  | 18  | 37  | 37           | No          | No          | No    |
| IKZF2  | 37 | 38 | 37 | 18  | 18  | 38  | 38           | No          | No          | No    |

TF: transcription factor; DC: Degree Centrality; CC: Closeness Centrality; BC: Betweenness Centrality; DFC: Disruptive Fragmentation Centrality; DCC: Disruptive Connection Centrality; DDC: Disruptive Distance Centrality; AVG.RANK: Average Ranking; Podo: Podocyte; T: Takasato protocol; M: Morizane protocol.
